# Supplementary material
Source: publisher figshare collection journal article supplement (https://sage.figshare.com/ndownloader/files/22862630)
Supplement: Supplementary file 1 [file 22862630]

#### Supplementary File 3: Test points and reference points

We recorded the 3D-coordinates of three predefined test-points on the femur (P1–P3), two test-points on the tibia and fibula (P4–P5), and three reference points in the limb press (R1–R3). (See Figure and

Table)


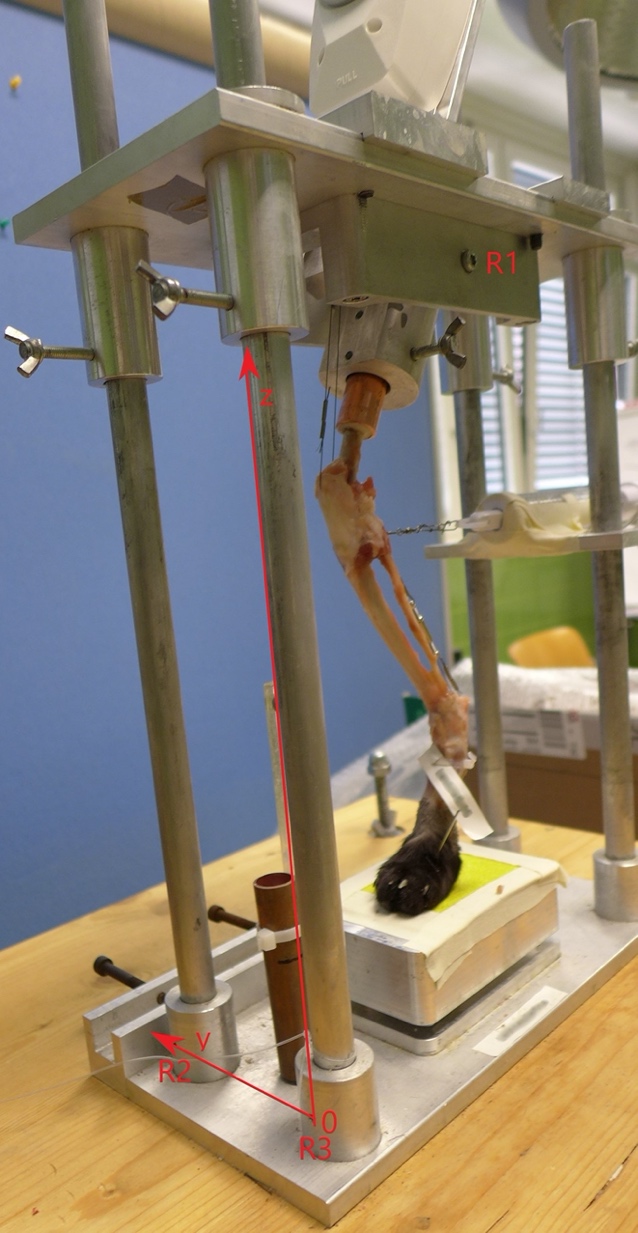


**Table**

| Location | Description |
| --- | --- |
| R1 | Screw center |
| R2 | Point on cranial column in the back of the limb press |
| R3 | Point on cranial column in the front of the limb press |
| P1 | Center of patella |
| P2 | Origin of lateral collateral ligament |
| P3 | Origin medial collateral ligament |
| P4 | Tibial tuberosity |
| P5 | Fibular head |

Test and reference points: R1–R3 = reference points on the limb press, P1–P5 = test-points on the femur and tibia
